# Supplementary material for: Higher socioeconomic status does not predict decreased prosocial behavior in a field experiment
Source: PubMed Central journal article supplement (PMC8275767; doi:10.1038/s41467-021-24519-5), 2021-07-12
Supplement: 41467_2021_24519_MOESM3_ESM.pdf [file 41467_2021_24519_MOESM3_ESM.pdf]

### **Description of Additional Supplementary Files**

File Name: Supplementary Data 1

Description: Includes the data from the main experiment (misdelaivered envelopes)

File Name: Supplementary Data 2

Description: Includes the survey data exploring individuals' knowledge on how to return misdelaivered envelopes.

File Name: Supplementary Data 3

Description: Includes the survey data concerning attitudes toward postal and other public services.

File Name: Supplementary Code 1

Description: This file contains the statistical code used for the analysis of our data.
